# Supplementary material
Source: Springer Nature journal article supplement (https://www.springermedizin.de/resource/supplementary/12935_2003_34_MOESM5_ESM.pdf/9540904)

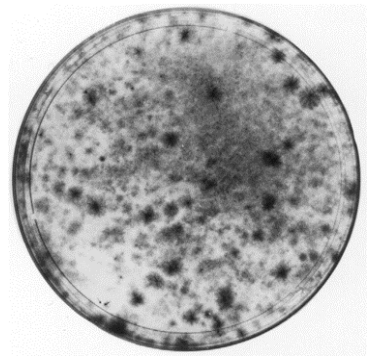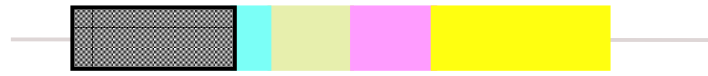

RSV 5'-truncated ccn3

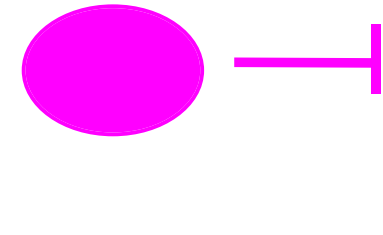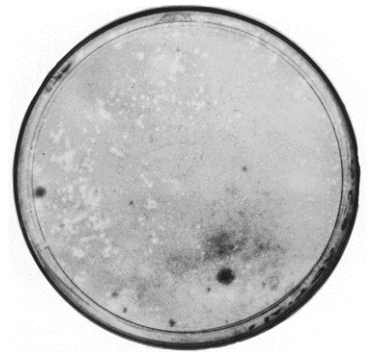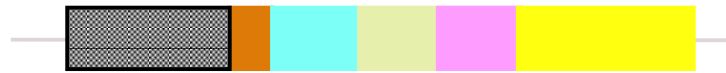

RSV full length ccn3

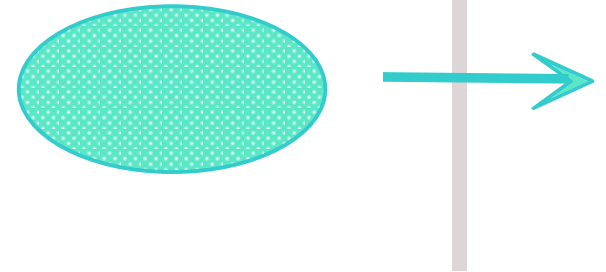

Supplement: MOESM5 [file 9540904]
